# Supplementary material
Source: PubMed Central journal article supplement (PMC6975264)
Supplement: jciinsight-4-132975-s181.pdf [file jciinsight-4-132975-s181.pdf]

# Supplemental Information

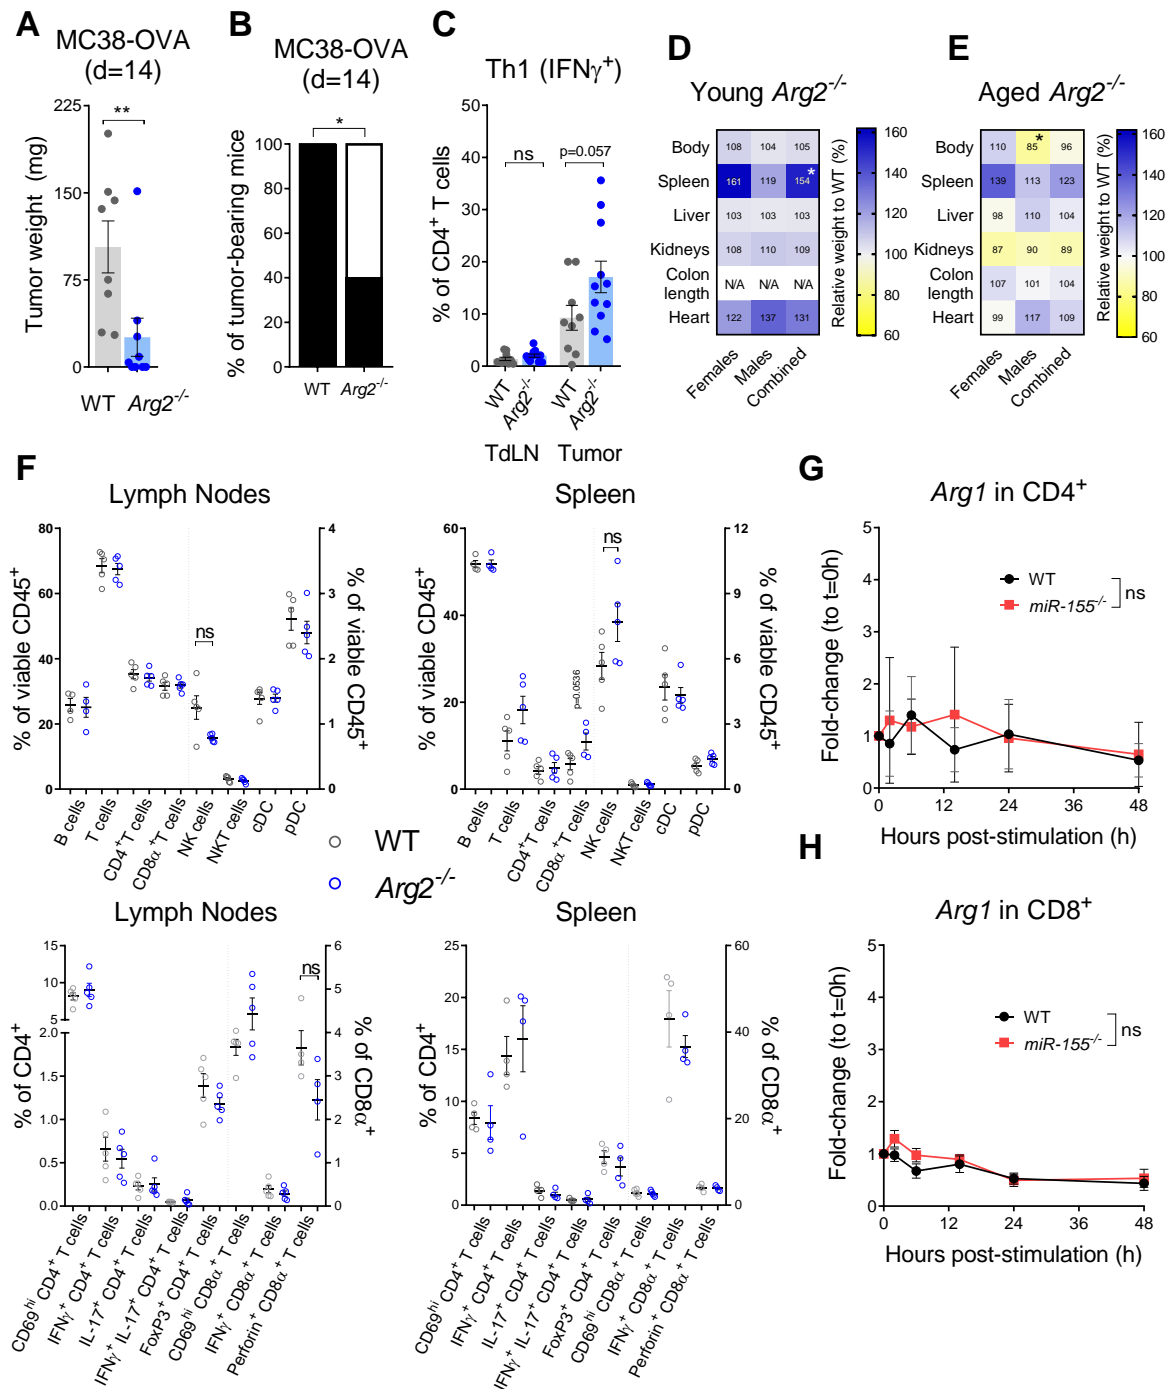

**Supplementary Figure 1. Additional characterization of *Arg2*<sup>-/-</sup> mice.** MC38-OVA tumor weight (a) and frequency of tumor-free mice at day 14 after tumor implantation (b) in male mice. (c) IFN $\gamma$ <sup>+</sup> Th1 cell frequencies were determined by flow cytometry in tumor-draining lymph nodes and tumor-infiltrating lymphocytes at day 9 after tumor implantation. (d,e) The heatmap represents changes in mean weights of major organs in young and aged *Arg2*<sup>-/-</sup> mice relative to WT mice. (f) Major DC and lymphocyte populations in the spleen and lymph nodes of WT and *Arg2*<sup>-/-</sup> mice were quantified by flow cytometry. (g,h) *Arg1* mRNA levels were determined by real-time qPCR in in vitro activated CD4<sup>+</sup> (g) or CD8<sup>+</sup> (h) T cells derived from WT or *miR155*<sup>-/-</sup> mice (n=6). Results are (a,f) representative of 3 independent experiments or (c,g,h) were pooled from two or three independent experiments. (g,h) Statistical analysis was done by two-way ANOVA test. Data is represented as mean  $\pm$  s.e.m. throughout. \*P < 0.05, \*\*P < 0.01, and \*\*\*P < 0.001 (a, c, d, f: two-tailed Student's t test) (b: Fisher's exact test) (g,h: two-way ANOVA)

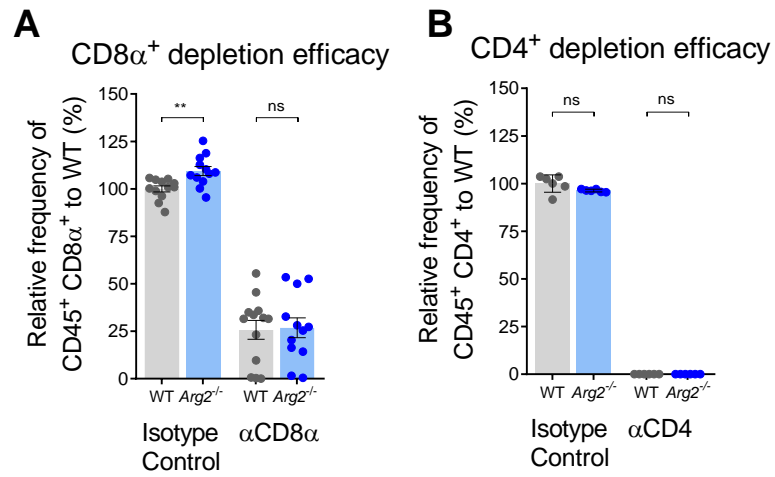

**Supplementary Figure 2. Efficacy of T cell depletion in tumor-bearing *Arg2* $^{-/-}$  mice.** T cell depletion efficacy in the blood was determined by flow cytometry for CD8 $^+$  T cells (a) at day 30 after tumor implantation and for CD4 $^+$  T cells (b) at day 14 after tumor implantation. Results were pooled from two independent experiments. Data is represented as mean  $\pm$  s.e.m. throughout. \*\* $P < 0.01$  (a, b: two-tailed Student's t test)

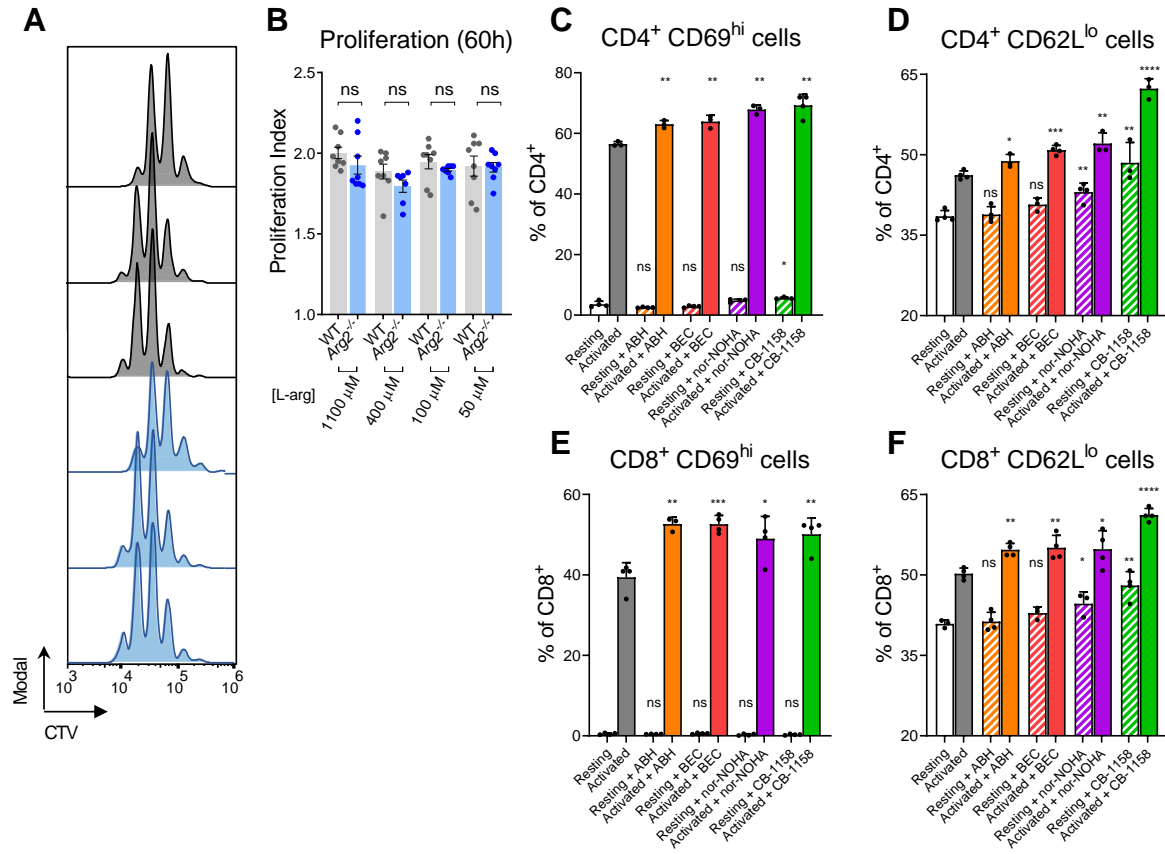

**Supplementary Figure 3. Deletion of *Arg2* does not affect in vitro proliferation of CD8<sup>+</sup> T cells.** (a) The results show representative dye dilution profiles for 60-hour in vitro activated WT (grey) and *Arg2*<sup>-/-</sup> (blue) CD8<sup>+</sup> T cells. (b) WT or *Arg2*<sup>-/-</sup> CD8<sup>+</sup> T cells were activated in vitro in RPMI containing the indicated concentrations of L-arginine. The proliferation index was calculated from dye dilution profiles obtained 60 hours after activation. (c-f) Total T cells were isolated from human PBMCs (n=4) and activated for 24 hours in the presence of the ABH, BEC, nor-NOHA and CB-1158 arginase inhibitors (30  $\mu$ M). Statistic analysis of the comparison between untreated cells and inhibitor-treated cells is represented for each condition. Results were pooled from two independent experiments. Data is represented as mean  $\pm$  s.e.m. throughout. \*P < 0.05, \*\*P < 0.01, \*\*\*P < 0.001 and \*\*\*\*P < 0.0001 (b-f: two-tailed Student's t test)

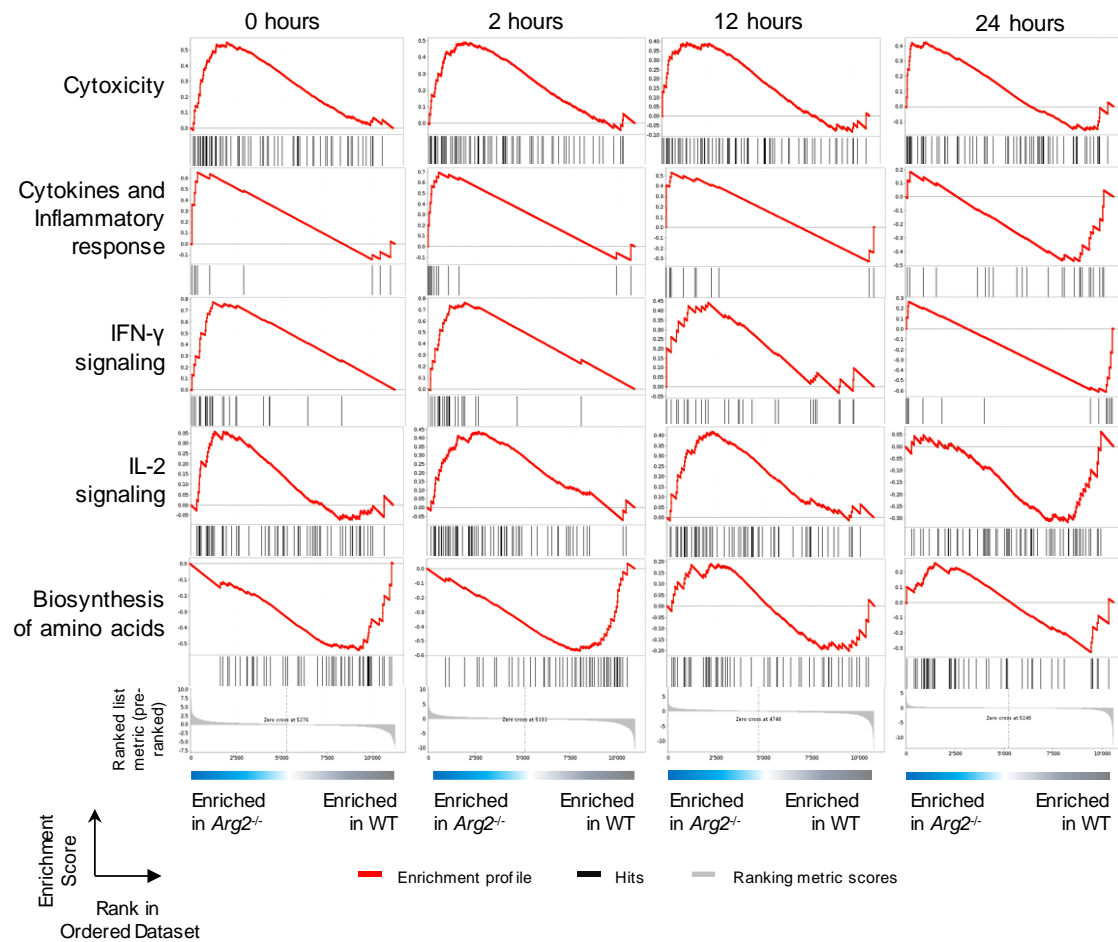

**Supplementary Figure 4. Transcriptome analysis of in vitro activated WT and  $Arg2^{-/-}$  CD8<sup>+</sup> T cells.** WT or  $Arg2^{-/-}$  OT-I CD8<sup>+</sup> T cells were activated in vitro with  $\alpha$ CD3 $\epsilon$  and  $\alpha$ CD28 antibodies and their transcriptome was determined by RNA-seq at different time points. Gene set enrichment analyses were then performed to identify pathways that are upregulated in  $Arg2^{-/-}$  cells relative to WT cells. The profiles represent the results of gene set enrichment analyses performed for the indicated gene sets at 0, 2, 12 and 24 hours post-activation. Results for the 6 hours time point are shown in Figure 4.

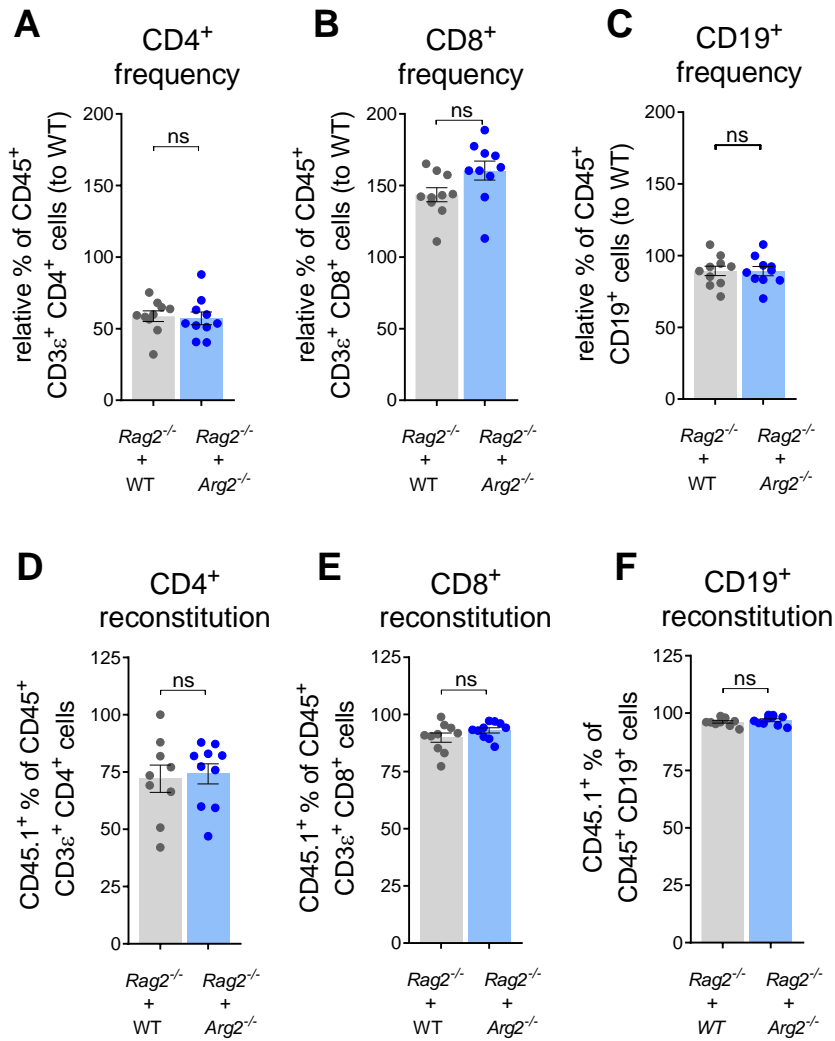

**Supplementary Figure 5. Analysis of mixed bone marrow chimeras used as donors of WT and Arg2<sup>-/-</sup> OT-I CD8<sup>+</sup> T cells.** Irradiated WT mice were reconstituted with a mixture, in a 9:1 ratio, of bone marrow derived from Rag2<sup>-/-</sup> mice and either WT or Arg2<sup>-/-</sup> OT-I mice. (a-c) Reconstitution was documented by flow cytometry: the results show the relative percentages of CD4<sup>+</sup> T cells (a), CD8<sup>+</sup> T cells (b) and CD19<sup>+</sup> B cells (c) within blood CD45<sup>+</sup> cells. Frequencies were normalized relative to mean values measured in a comparable group of naive WT mice (data not shown). (d-f) Percentages of lymphocytes derived from donor CD45.1<sup>+</sup> OT-I bone marrow were determined by flow cytometry for circulating CD4<sup>+</sup> T cells (d), CD8<sup>+</sup> T cells (e) and CD19<sup>+</sup> B cells (f). Results were pooled from two independent experiments. Data is represented as mean ± s.e.m. throughout. \*P < 0.05 (a-f: two-tailed Student's t test)

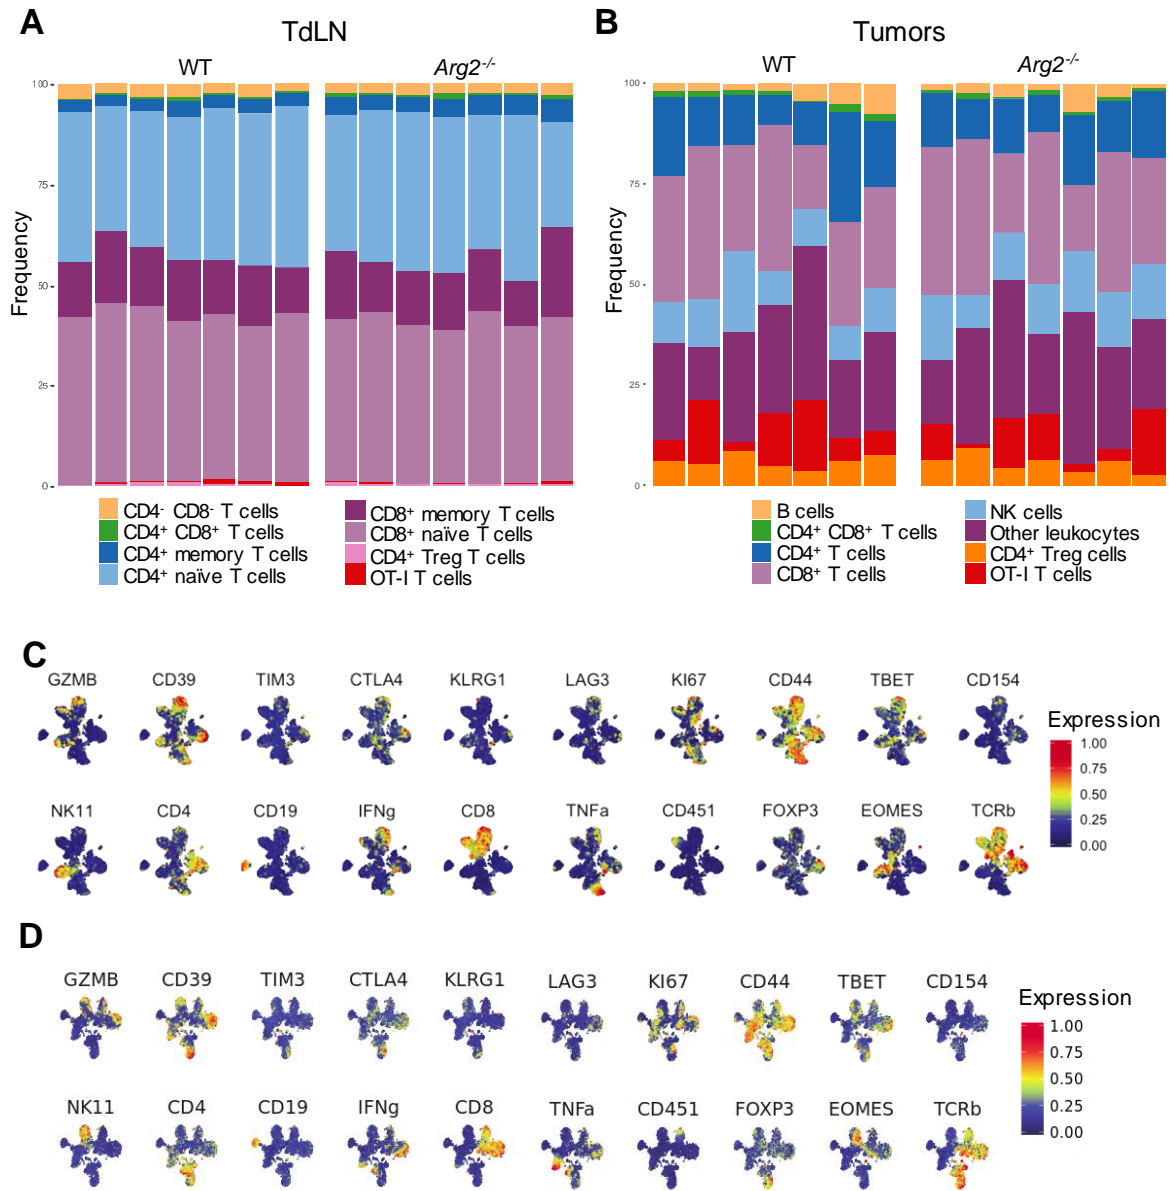

**Supplementary Figure 6. High-dimensional flow cytometry analysis of lymphocyte populations in tumor-bearing mice.** MC38-OVA tumor-bearing mice were adoptively transferred with WT or *Arg2<sup>-/-</sup>* CD8<sup>+</sup> OT-I cells and immunized one day later with CpG-B and OVA<sub>257-264</sub>. Seven days later, lymphocyte populations in TdLNs and tumors were analyzed using high-dimensional flow cytometry. (a) Barplots of major subpopulations amongst (a) TCRb<sup>+</sup> T cells in the TdLNs or (b) CD45<sup>+</sup> cells in each individual mouse. (c) tSNE plots showing stochastically selected T cells in TdLNs from both WT OT-I and *Arg2<sup>-/-</sup>* OT-I recipient mice. (d) tSNE plots showing stochastically selected CD45<sup>+</sup> cells in tumors from both WT OT-I and *Arg2<sup>-/-</sup>* OT-I recipient mice.

## Young adults – 12 weeks old

|                                                | Animals affected |                     | Significance                             |
|------------------------------------------------|------------------|---------------------|------------------------------------------|
|                                                | WT               | Arg2 <sup>-/-</sup> |                                          |
| ADRENALS                                       |                  |                     |                                          |
| Accessory                                      | 1                |                     | Background                               |
| Cortical nodular hyperplasia                   | 1                |                     | Background                               |
| Subcapsular cell hyperplasia                   |                  | 1                   | Background                               |
| SPLEEN                                         |                  |                     |                                          |
| Accessory                                      |                  | 1                   | Background                               |
| GALLBLADDER                                    |                  |                     |                                          |
| Cystic dilation                                | 1                |                     | Background                               |
| LIVER                                          |                  |                     |                                          |
| Oval cell hyperplasia                          |                  | 1                   | Incidental                               |
| Single cell necrosis                           | 1                | 1                   | Incidental                               |
| Extramedullary hematopoiesis                   | 2                | 2                   | To be judged with CBC** ante mortem      |
| SEMINAL VESICLES                               |                  |                     |                                          |
| Dilatation                                     | 1                |                     | Background                               |
| TRICUSPID VALVE                                |                  |                     |                                          |
| Melanosis                                      |                  | 1                   | Background, common in black coated       |
| HEART                                          |                  |                     |                                          |
| Interstitial fatty vacuolation                 | 1                |                     | Incidental                               |
| CERVICAL LYMPH NODES                           |                  |                     |                                          |
| Sinus histiocytosis                            | 2                | 2                   | Background                               |
| Hemorrhage                                     | 1                |                     | Iatrogenic (due to cervical dislocation) |
| THYMUS                                         |                  |                     |                                          |
| Hemorrhage                                     | 1                |                     | Iatrogenic (due to cervical dislocation) |
| KIDNEY                                         |                  |                     |                                          |
| Lymphocytic infiltrate (corticomedullary)      | 4                | 3                   | Background/Reactive                      |
| Tubular epithelial basophilia                  |                  | 1                   | Incidental                               |
| Tubular hyaline cast                           |                  | 1                   | Incidental                               |
| EPYDIDYMS                                      |                  |                     |                                          |
| Giant sperms                                   | 1                |                     | Background                               |
| STOMACH                                        |                  |                     |                                          |
| Glandular mineralization                       | 1                |                     | Incidental                               |
| Epithelial eosinophilic cytoplasmic inclusions | 1                |                     | Background                               |
| Neutrophilic infiltrate                        | 1                |                     | Incidental                               |

\*\*bone marrow cellularity and ratios comparable between groups

## Aged adults – 21 months old

|                                                              | Animals affected |         | Significance              |
|--------------------------------------------------------------|------------------|---------|---------------------------|
|                                                              | WT               | Arg2-/- |                           |
| SPLEEN                                                       |                  |         |                           |
| Extramedullary hematopoiesis                                 | 9                | 9       | Background                |
| Hemosiderosis                                                | 9                | 9       | Background                |
| Hyperplasia, lymphocytic                                     | 3                | 1       | Background/ Reactive      |
| Lymphoma, pleomorphic                                        | 2                | 3       | Neoplasia                 |
| Amyloidosis                                                  |                  | 3       |                           |
| CERVICAL AND MEDIASTINAL LYMPH NODES                         |                  |         |                           |
| Hyperplasia, lymphocytic                                     | 2                | 2       | Background/ Reactive      |
| Lymphoma, pleomorphic                                        | 1                | 1       | Neoplasia                 |
| Hemosiderosis                                                | 2                | 1       | Background                |
| Plasmacytosis                                                |                  | 1       | Background                |
| Proliferation/Infiltration, plasmacellular, histiocytic      |                  | 4       | Reactive                  |
| Infiltration, histiocytic, pigment containing                | 3                | 2       | Background/Reactive       |
| MESENTERIC AND PANCREATIC LYMPH NODES                        |                  |         |                           |
| Lymphoma, pleomorphic                                        | 2                | 2       | Neoplasia                 |
| Hyperplasia, lymphocytic                                     | 4                |         | Background/ Reactive      |
| Extramedullary hematopoiesis                                 | 1                |         | Background                |
| Proliferation/Infiltration, plasmacellular, histiocytic      |                  | 1       | Background/ Reactive      |
| Infiltration, histiocytic, pigment containing                | 1                | 1       |                           |
| BONE MARROW                                                  |                  |         |                           |
| Hemosiderosis                                                | 1                |         | Neoplasia                 |
| HEART                                                        |                  |         |                           |
| Amyloidosis including Purkinje fibers and arterial walls     |                  | 1       |                           |
| BLOOD VESSELS                                                |                  |         |                           |
| Arteries: Tunica media thickening / hyalinization            |                  | 1       | Background                |
| Amyloidosis of liver arteries                                |                  | 1       |                           |
| MANDIBULAR SALIVARY GLAND                                    |                  |         |                           |
| Lymphoma, pleomorphic                                        | 1                |         | Neoplasia                 |
| Infiltration, lympho-histiocytic and plasmacellular          | 1                | 4       | Background/Age related    |
| Infiltration, lymphocytic                                    | 4                |         | Background/Age related    |
| PAROTID SALIVARY GLAND                                       |                  |         |                           |
| Lymphoma, pleomorphic                                        | 1                |         | Neoplasia                 |
| Infiltration, lymphocytic                                    | 1                |         | Background/Age related    |
| STOMACH                                                      |                  |         |                           |
| Amyloidosis                                                  | 3                | 3       | Amyloidosis               |
| SMALL INTESTINE                                              |                  |         |                           |
| Amyloidosis                                                  | 3                | 3       |                           |
| Lymphoma, pleomorphic                                        | 1                |         | Neoplasia                 |
| Crypt abscess                                                | 1                |         | Incidental                |
| LARGE INTESTINE                                              |                  |         |                           |
| Pinworm infestation                                          | 1                | 5       | Background /Parasitosis   |
| Amyloidosis                                                  | 3                | 2       |                           |
| Infiltration lymphocytic and plasmacellular                  |                  | 2       | Background/ Reactive      |
| PANCREAS                                                     |                  |         |                           |
| Vacuolation acinar cell                                      | 1                | 1       | Background                |
| Focal hyperplasia                                            | 1                | 1       | Background /Proliferative |
| LIVER                                                        |                  |         |                           |
| Extramedullary hematopoiesis                                 | 6                | 9       | Background                |
| Lymphoma, pleomorphic                                        | 2                | 2       | Neoplasia                 |
| Hemosiderosis                                                | 1                |         | Background                |
| Infiltration, lympho-histiocytic and plasmacellular          |                  | 3       | Background/Reactive       |
| Hepatocellular carcinoma                                     | 1                |         | Neoplasia                 |
| Hepatocellular vacuolation, large vacuolar                   |                  | 2       | Background                |
| TRACHEA                                                      |                  |         |                           |
| Ectasia/Eosinophilic crystal deposition in submucosal glands | 2                | 2       | Background                |
| LUNG                                                         |                  |         |                           |
| Hemosiderosis                                                | 1                | 1       | Background                |
| Adenoma, pulmonary                                           |                  | 1       | Neoplasia                 |
| Hemosiderosis                                                | 1                |         | Incidental                |
| Acidophilic macrophage pneumonia                             | 1                | 3       | Background                |
| Lymphoma, pleomorphic                                        | 1                | 1       | Neoplasia                 |
| Infiltration, lympho-histiocytic and plasmacellular          | 2                | 4       | Reactive                  |
| Infiltration, histiocytic                                    | 1                | 1       | Reactive                  |
| Infiltration, mixed cellular                                 | 2                |         | Reactive/Incidental       |
| KIDNEYS                                                      |                  |         |                           |
| Infiltration, lympho-histiocytic                             | 4                | 6       | Background/ Reactive      |
| Amyloidosis                                                  |                  | 1       |                           |
| Lymphoma, pleomorphic                                        | 1                | 1       | Neoplasia                 |
| Glomerulosclerosis                                           | 1                |         | Incidental                |
| URINARY BLADDER                                              |                  |         |                           |
| Infiltration, lymphocytic                                    | 1                |         | Incidental                |
| Lymphoma, pleomorphic                                        | 1                |         | Neoplasia                 |
| ADRENALS                                                     |                  |         |                           |
| Pigment deposition, cortical                                 | 2                |         | Background/Age related    |
| Amyloidosis                                                  |                  | 1       |                           |
| SKIN                                                         |                  |         |                           |
| Infiltration, lymphocytic                                    | 1                |         | Background/Reactive       |
| BRAIN                                                        |                  |         |                           |
| Epidermoid cyst                                              | 1                |         | Background                |
| OVARY                                                        |                  |         |                           |
| Atrophy and pigmentation                                     | 4                | 5       | Background/Age related    |
| OVIDUCT                                                      |                  |         |                           |
| Infiltration, lymphocytic                                    | 1                | 1       | Background/Reactive       |
| Atrophy, epithelial                                          | 1                |         | Background/Age related    |
| UTERUS                                                       |                  |         |                           |
| Hyperplasia, cystic                                          | 3                | 3       | Background/Age related    |
| Dilation                                                     |                  | 1       | Background/Age related    |
| MAMMARY GLAND                                                |                  |         |                           |
| Hyperplasia alveolar epithelium                              | 1                |         | Background/Age-related    |
| TESTIS                                                       |                  |         |                           |
| Tubular atrophy/degeneration                                 | 2                |         | Background/Age related    |
| PREPUTIAL GLANDS                                             |                  |         |                           |
| Inflammation, neutrophilic                                   | 1                | 1       | Background/Inflammator    |
| Cystic dilation                                              | 1                |         | Background                |

**Supplementary Table 1. Histopathologic analyses of young and aged Arg2-deficient mice.** A total of (a) 16 or (b) 20 C57BL/6J mice (Charles River), aged 12 weeks were sent for examination. The mice were composed of 4 balanced groups composing of (a) four or (b) five arginase 2 knockout mice (Arg2<sup>-/-</sup>) and (a) four or (b) five control (Arg2<sup>+/+</sup>) animals for each gender. The analyzed organs included: spleen, cervical and mediastinal lymph nodes, mesenteric and pancreatic lymph nodes, thymus, bone marrow, heart, blood vessels, mandibular salivary gland, sublingual salivary gland, parotid salivary gland, oral cavity, tongue, esophagus, stomach, small intestine, large intestine, pancreas, liver, nasal cavity, trachea, lung, kidneys, urinary bladder, ovary/testis, oviduct/epididymis, uterus/prostate/ coagulative gland/ seminal vesicles, vagina/penis, clitoral glands/ preputial glands, mamma, adrenals, thyroid, skin, muscle, knee joint, bone, brain, spinal cord, eye and ear.

| Gene   | Assay   | Sense   | Sequence                  |
|--------|---------|---------|---------------------------|
| mRag2  | PCR     | Fw      | CAGCGCTCCTCCTGATACTC      |
|        |         | Rev     | TGCATTCCCTAGAGCGTCCTT     |
|        |         | Rev Mut | GGTCATCCTTTGCAACACAG      |
| mArg2  | PCR     | Fw      | CTCACTGTAACCCAGCCTCAG     |
|        |         | Rev     | CATGAGCATCAACCCAGATG      |
|        |         | Rev Mut | CAGTCATAGCCGAATAGCC       |
| mBIC   | PCR     | Fw      | GCCCTGGCTGTACCCCCTATCTTG  |
|        |         | Rev     | CATACAGCCTTCAGCAAGCCTCCA  |
|        |         | Mutant  | GAAATGCGTAGGAAACGTGGGTCTC |
| mArg2  | qRT-PCR | Fw      | CTGTGTCACCATGGGAGGAG      |
|        |         | Rev     | GCATGAGCATCAACCCAGAT      |
| mArg1  | qRT-PCR | Fw      | ATGAAGAGCTGGCTGGTGTG      |
|        |         | Rev     | GCCAGAGATGCTTCCAAGT       |
| mBIC   | qRT-PCR | Fw      | AACCAGGAAGGGGAAGTGTG      |
|        |         | Rev     | TTCAGCAAGCCTCCAGCA        |
| 18S    | qRT-PCR | Fw      | CTTAGAGGGACAAGTGGCG       |
|        |         | Rev     | ACGCTGAGCCAGTCAGTGTA      |
| mGAPDH | qRT-PCR | Fw      | CCCGTAGACAAAATGGTGAAG     |
|        |         | Rev     | AGGTCAATGAAGGGGTCGTTG     |
| mIFNg  | qRT-PCR | Fw      | GGATGCATTCATGAGTATTG      |
|        |         | Rev     | CTTTCCGCTTCCTGAGG         |
| mIL2   | qRT-PCR | Fw      | TTCAATTGGAAGATGCTGAGAA    |
|        |         | Rev     | TCATCGAATTGGCACTCAA       |
| mNOS2  | qRT-PCR | Fw      | GCCCTCCCTCTGGAAAGAC       |
|        |         | Rev     | AGGACTCTGAGGCTGTGTGG      |

Supplementary Table 2. List of primers used for PCR or qRT-PCR.

| REAGENT or RESOURCE                                      | SOURCE                            | IDENTIFIER     |
|----------------------------------------------------------|-----------------------------------|----------------|
| BV650 Hamster Anti-Mouse CD154 ( MR1)                    | Becton Dickinson (BD) Biosciences | Cat#740480     |
| BUV661 Rat Anti-Mouse CD19 ( 1D3)                        | BD Biosciences                    | Cat#565076     |
| PerCP-eFluor 710 Rat- Anti-Mouse CD39 ( 24DMS1)          | Thermo Scientific™                | Cat#46-0391-82 |
| BUV496 Rat Anti-Mouse CD4 ( GK1.5)                       | BD Biosciences                    | Cat#564667     |
| Brilliant Violet 570™ Anti-mouse/human CD44 ( IM7)       | BioLegend                         | Cat#103037     |
| BUV563 Rat Anti-Mouse CD45 ( 30-F11)                     | BD Biosciences                    | Cat#565710     |
| Brilliant Violet 785™ Mouse Anti-mouse CD45.1 ( A20)     | BioLegend                         | Cat#110743     |
| BUV805 Rat Anti-Mouse CD8a ( 53-6.7)                     | BD Biosciences                    | Cat#612898     |
| APC-R700 Hamster Anti-Mouse CD152 ( UC10-4F10-11)        | BD Biosciences                    | Cat#565778     |
| PE-eFluor 610 Rat Anti-Mouse Eomes ( Dan11mag)           | Thermo Scientific™                | Cat#61-4875-82 |
| PE Rat Anti-Mouse FoxP3 Monoclonal Antibody ( FJK-16s)   | Thermo Scientific™                | Cat#12-5773-82 |
| FITC Mouse Anti-human/mouse Granzyme B ( GB11)           | BioLegend                         | Cat#515403     |
| BUV737 Rat Anti-Mouse IFN-γ ( XMG1.2)                    | BD Biosciences                    | Cat#564693     |
| BV480 Mouse Anti-Ki-67 ( B56)                            | BD Biosciences                    | Cat#566109     |
| APC Syrian hamster Anti-mouse/human KLRG1 (2F1/KLRG1)    | BioLegend                         | Cat#138412     |
| Brilliant Violet 421™ Rat Anti-mouse CD223 ( C9B7W)      | BioLegend                         | Cat#125221     |
| Biotin Mouse Anti-Mouse NK-1.1 ( PK136)                  | BD Biosciences                    | Cat#553163     |
| Brilliant Violet 605™ Rat Anti-mouse CD279 ( 29F.1A12)   | BioLegend                         | Cat#135220     |
| PE-Cy7 Mouse Anti-Mouse T-bet ( eBio4B10)                | Thermo Scientific™                | Cat#25-5825-82 |
| PE-Cy5 Armenian hamster anti-mouse TCRβ chain(H57-597)   | BioLegend                         | Cat#109210     |
| APC Rat Anti-mouse CD366 ( RMT3-23)                      | BioLegend                         | Cat#119706     |
| Brilliant Violet 711™ Rat Anti-mouse TNF-α ( MP6-XT22)   | BioLegend                         | Cat#506349     |
| PerCP/Cyanine5.5 Rat Anti-mouse TCR Vα2 ( B20.1)         | BioLegend                         | Cat#127814     |
| APC Mouse Anti-mouse CD45.2 ( 104)                       | BioLegend                         | Cat#109814     |
| PE Mouse anti-mouse TCR Vβ5.1, 5.2 ( MR9-4)              | BioLegend                         | Cat#139504     |
| APC/Cy7 Rat Anti-mouse CD4 ( RM4-5)                      | BioLegend                         | Cat#100526     |
| FITC Rat Anti-mouse CD3 ( 17A2),                         | Thermo Scientific™                | Cat#11-0032-80 |
| APC Rat Anti-Mouse (eBioOMAK-D), APC                     | Thermo Scientific™                | Cat#17-9392-80 |
| PE Rat Anti-mouse Eomes ( Dan11mag)                      | Thermo Scientific™                | Cat#12-4875-82 |
| PerCP-Cyanine5.5 Rat Anti-mouse IFNγ ( XMG1.2),          | Thermo Scientific™                | Cat#45-7311-82 |
| FITC Armenian hamster Anti-mouse CD69 ( H1.2F3)          | Thermo Scientific™                | Cat#11-0691-82 |
| PerCP-eFluor 710Rat Anti-mouse CD279 ( RMP1-30)          | Thermo Scientific™                | Cat#46-9981-82 |
| PE Rat Anti-mouse anti-mouse IL-17A ( TC11-18H10.1)      | BioLegend                         | Cat#506904     |
| PerCP/Cyanine5.5 Mouse Anti-mouse NK-1.1 ( PK136)        | BioLegend                         | Cat#108728     |
| APC Rat Anti-mouse CD62L ( MEL-14)                       | Thermo Scientific™                | Cat#17-0621-82 |
| Rat Anti-mouse PerCP/Cy5.5 anti-mouse Siglec H (551)     | BioLegend                         | Cat#129614     |
| InVivoMAb anti-mouse CD4                                 | BioXCell                          | Cat#BE0003-1   |
| InVivoMAb rat IgG2b isotype control, anti-KLH            | BioXCell                          | Cat#BE0090     |
| InVivoMAb rat IgG2a isotype control, anti-trinitrophenol | BioXCell                          | Cat#BE0089     |
| InVivoMAb anti-mouse CD8α                                | BioXCell                          | Cat#BE0004-1   |
| InVivoMAb anti-mouse PD-1 (CD279)                        | BioXCell                          | Cat#BE0146     |
| InVivoMAb anti-mouse CD3ε                                | BioXCell                          | Cat#145-2C11   |
| Purified NA/LE Hamster Anti-Mouse CD28                   | BD Biosciences                    | Cat#553294     |
| Arginase II Antibody (H-64)                              | Santa Cruz Biot.                  | Cat#sc-20151   |
| β-Actin Antibody (C4)                                    | Santa Cruz Biot.                  | Cat#sc-47778   |
| BV421 Mouse Anti-Human CD62L ( DREG-56)                  | BioLegend                         | Cat#304827     |
| FITC Mouse Anti-Human CD8 (HIT8a)                        | BD Biosciences                    | Cat#560960     |
| PE-Cy7 CD4 Mouse Anti-Human (SFC112T4D11)                | Beckman Coulter                   | Cat#737660     |
| PE Mouse Anti-Human CD69 (FN50)                          | BioLegend                         | Cat#310906     |
| APC/Fire™ Mouse Anti-Human CD3 (SK7)                     | BioLegend                         | Cat#344840     |

**Supplementary Table 3. List of antibodies used in flow cytometry, Western Blot and in vivo experiments**
